# Supplementary material
Source: Springer Nature journal article supplement (https://www.springermedizin.de/resource/supplementary/13099_2014_166_MOESM1_ESM.pdf/9665670)

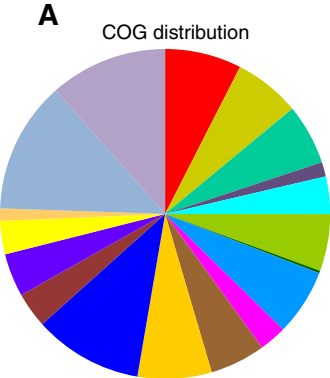

COG category feature (counts)

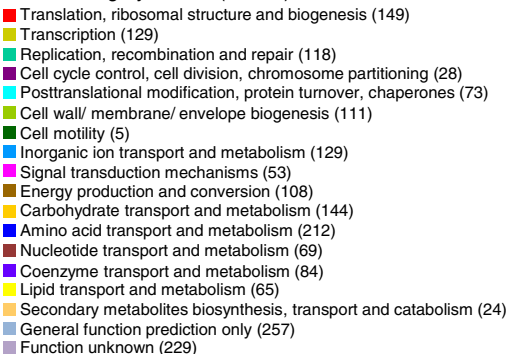

**B**

Subsystem distribution

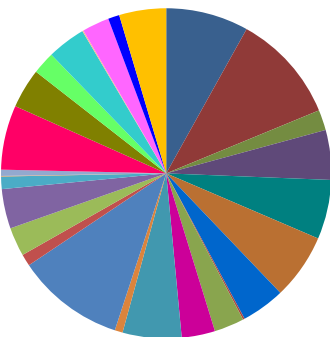

Subsystem feature (counts)

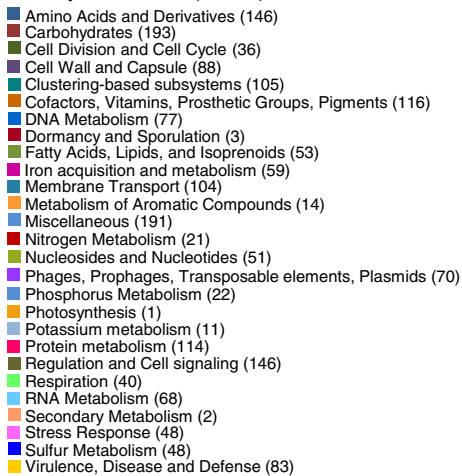

Supplement: MOESM1 [file 9665670]
